# Supplementary material for: The adsorption and growth of Agn (n = 1–4) clusters on cubic, monoclinic, and tetragonal ZrO2 surfaces: a first-principles study
Source: Royal Society of Chemistry journal article supplement (doi:10.1039/c9nj03769a), 2020-01-01

***Supporting Informations***

**The Adsorption and Growth of  $\text{Ag}_n$  ( $n = 1\sim 4$ ) Clusters  
on Cubic, Monoclinic, and Tetragonal  $\text{ZrO}_2$  Surfaces:  
A First-Principles Study**

Tingting Liu<sup>a</sup>, Yan Li<sup>\*b</sup>, Changhai Liang<sup>\*a</sup>

*<sup>a</sup>School of Petroleum and Chemical Engineering, Dalian University of Technology,  
Panjin, 124221, P. R. China*

*<sup>b</sup>School of Chemical Engineering, University of Science and Technology Liaoning,  
Anshan 114051, P. R. China*

**Corresponding person: Yan Li**

**E-mail: snow2007liyan@163.com**

**Telephone: 86-15142738951**

**Fax: 86-427-2631111**

**Fig. S1** Top view of all the adsorption configurations and the corresponding energies of  $\text{Ag}_n$  ( $n = 1 \sim 4$ ) structures adsorbed on  $\text{c-ZrO}_2$  (1 1 1) surface at all possible sites. Only the surface atoms are shown as round (red, O; white-blue, Zr, dark-blue, Ag). This notation is used throughout this paper.

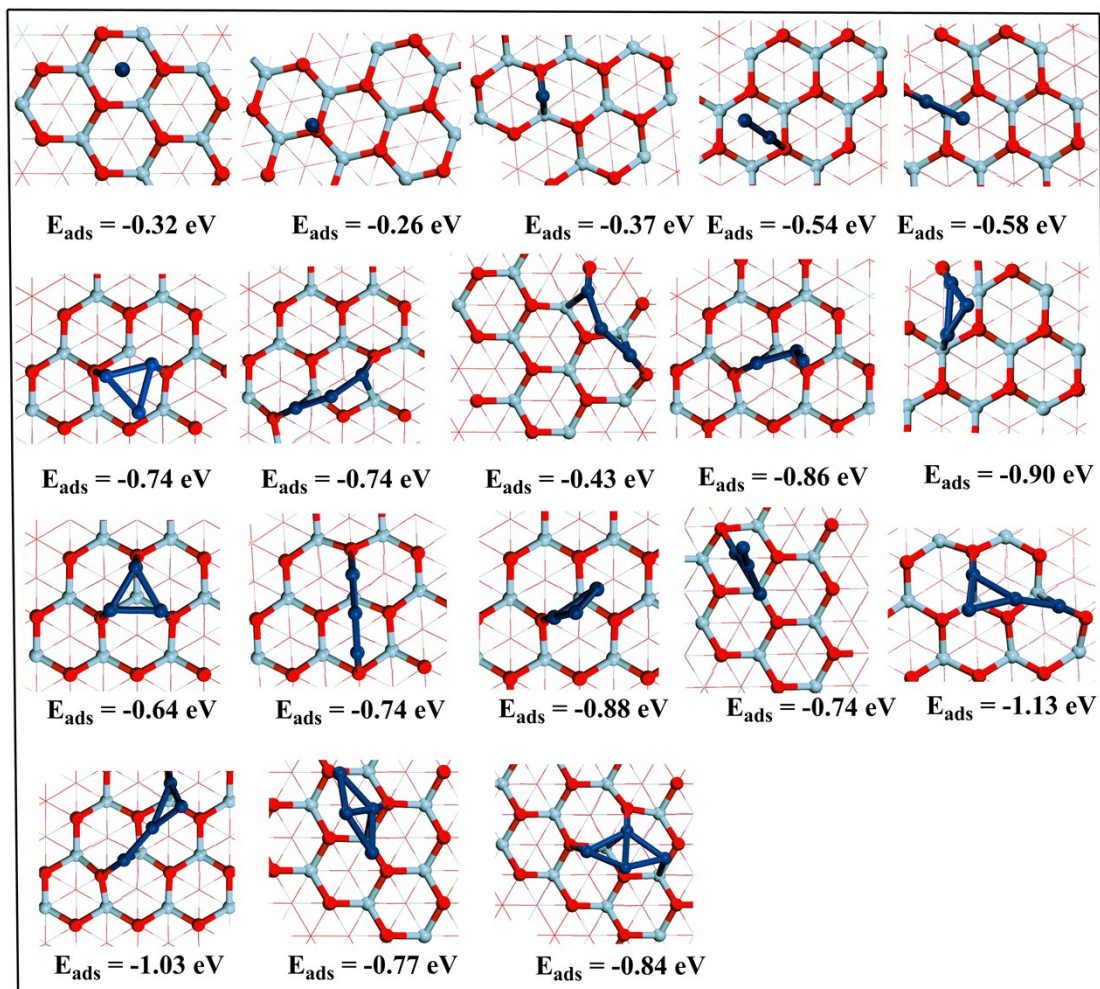

**Fig. S2** Top view of all the adsorption configurations and the corresponding energies of  $\text{Ag}_n$  ( $n = 1 \sim 4$ ) structures adsorbed on  $\text{t-ZrO}_2$  (1 0 1) surface at all possible sites.

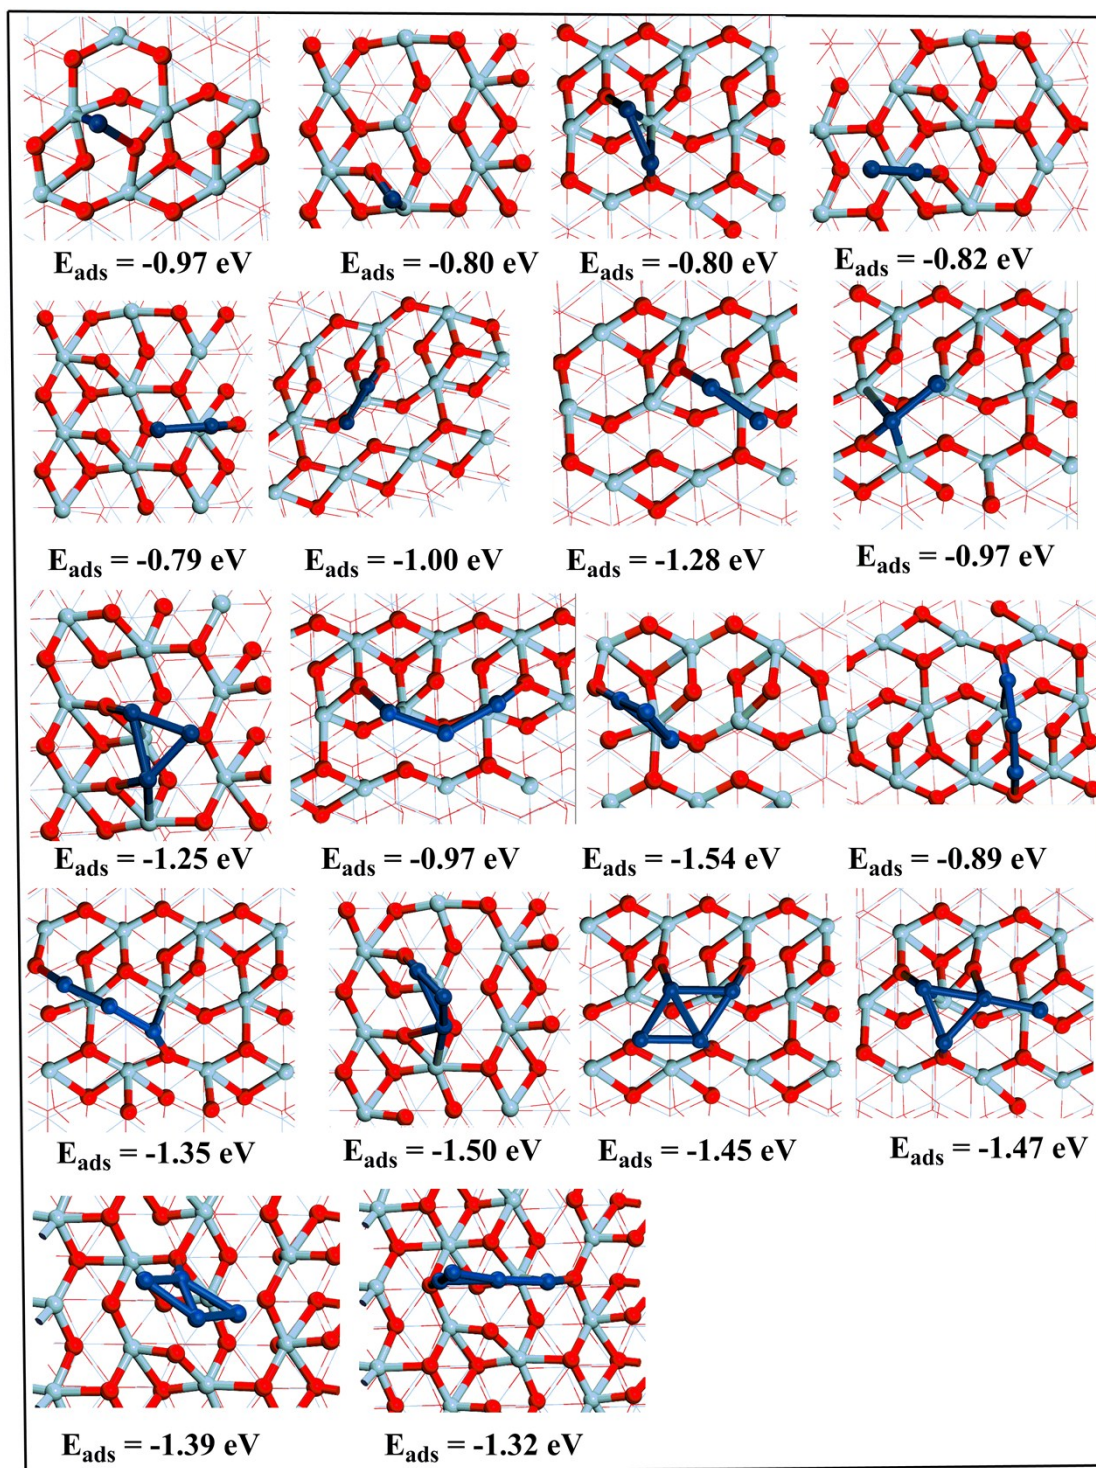



**Fig. S3** Top view of all the adsorption configurations and the corresponding energies of  $\text{Ag}_n$  ( $n = 1 \sim 4$ ) structures adsorbed on  $\text{m-ZrO}_2$  ( $\bar{1} \ 1 \ 1$ ) surface at all possible sites.

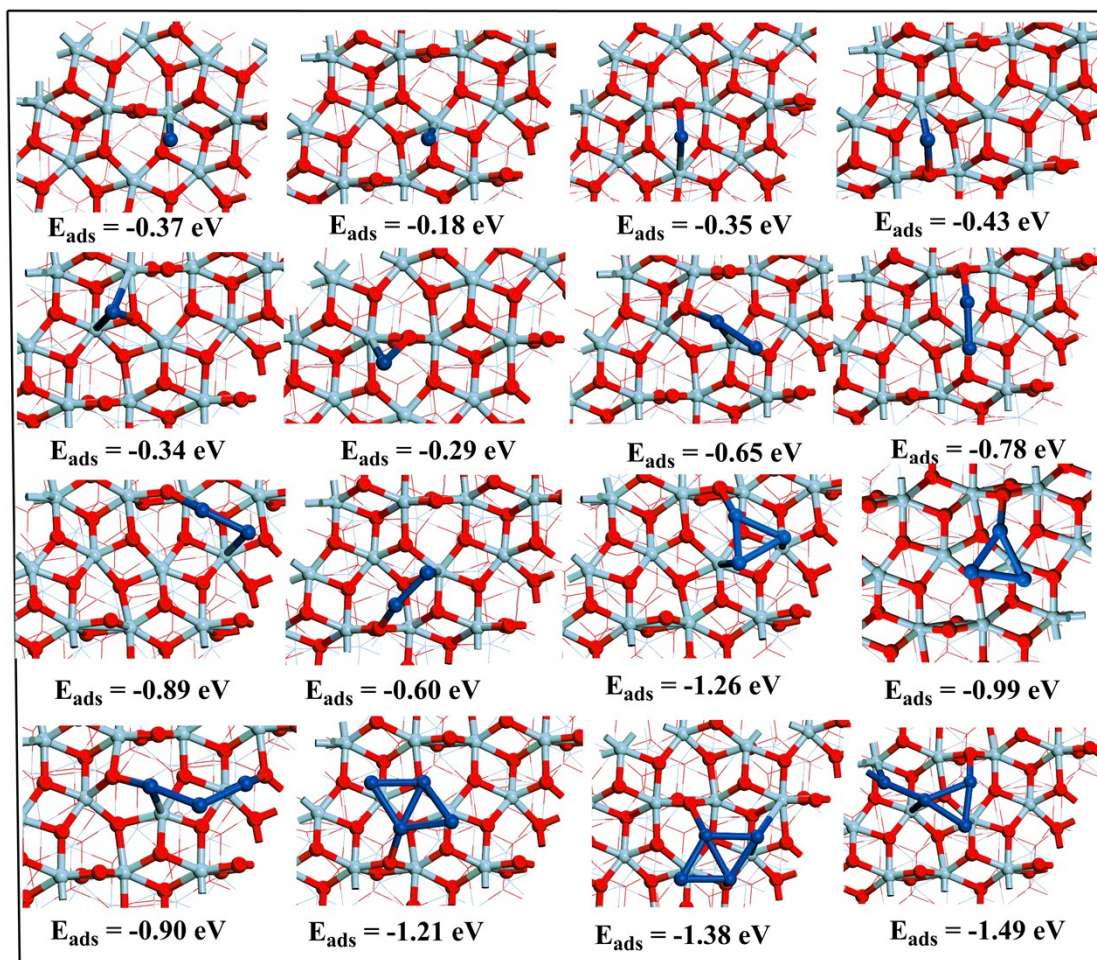

Supplement: c9nj03769a1.pdf [file c9nj03769a1.pdf]
